# Supplementary material for: β-Catenin/CBP–Dependent Signaling Regulates TGF-β–Induced Epithelial to Mesenchymal Transition of Lens Epithelial Cells
Source: PubMed Central journal article supplement — Invest Ophthalmol Vis Sci. 2016 Oct;57(13):5736–47. doi: 10.1167/iovs.16-20162 (PMC5089212; doi:10.1167/iovs.16-20162), 2016-10
Supplement: iovs-57-11-59_s01.pdf [file iovs-57-11-59_s01.pdf]

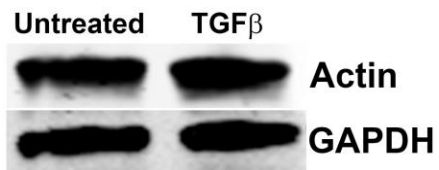

**Figure S1 – Level of actin in the presence of TGF-β.** Western blot analysis for actin and GAPDH was carried out using protein lysates extracted from untreated lens explants and TGF-β2-treated lens explants.

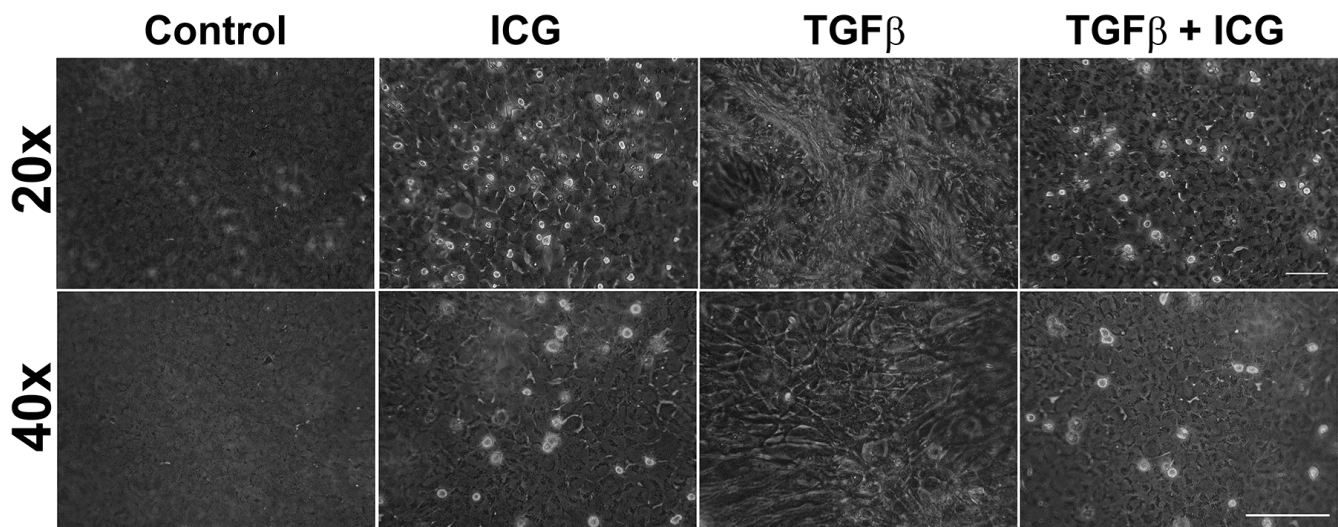

**Figure S1**

**Figure S2 – Cellular morphology of lens explants in the presence of ICG-001.** Untreated, ICG-001-treated, TGF-β2-treated, TGF-β2 and ICG-001 co-treated lens explants were imaged using Leica DMIL phase contrast microscope. The images were further analyzed using Photoshop CS4. Scale bar, 100μm.

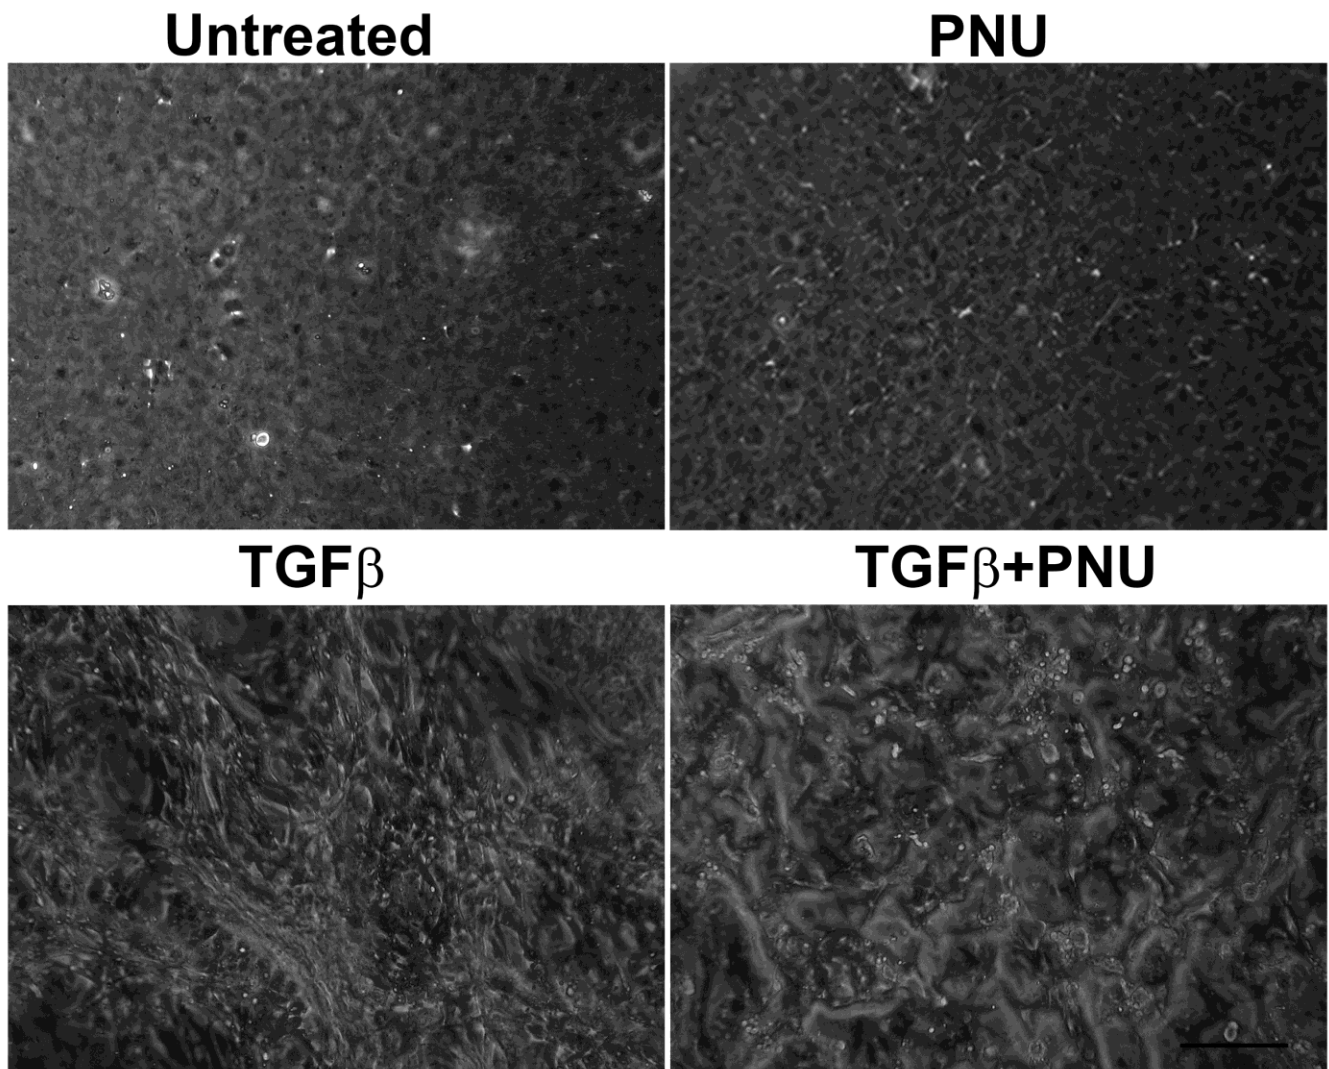

**Figure S3 – Cellular morphology of lens explants in the presence of PNU.** Untreated, PNU-treated, TGF- $\beta$ 2-treated, TGF- $\beta$ 2 and PNU co-treated lens explants were imaged using Leica DMIL phase contrast microscope. The images were further analyzed using Photoshop CS4. Scale bar, 100 $\mu$ m.

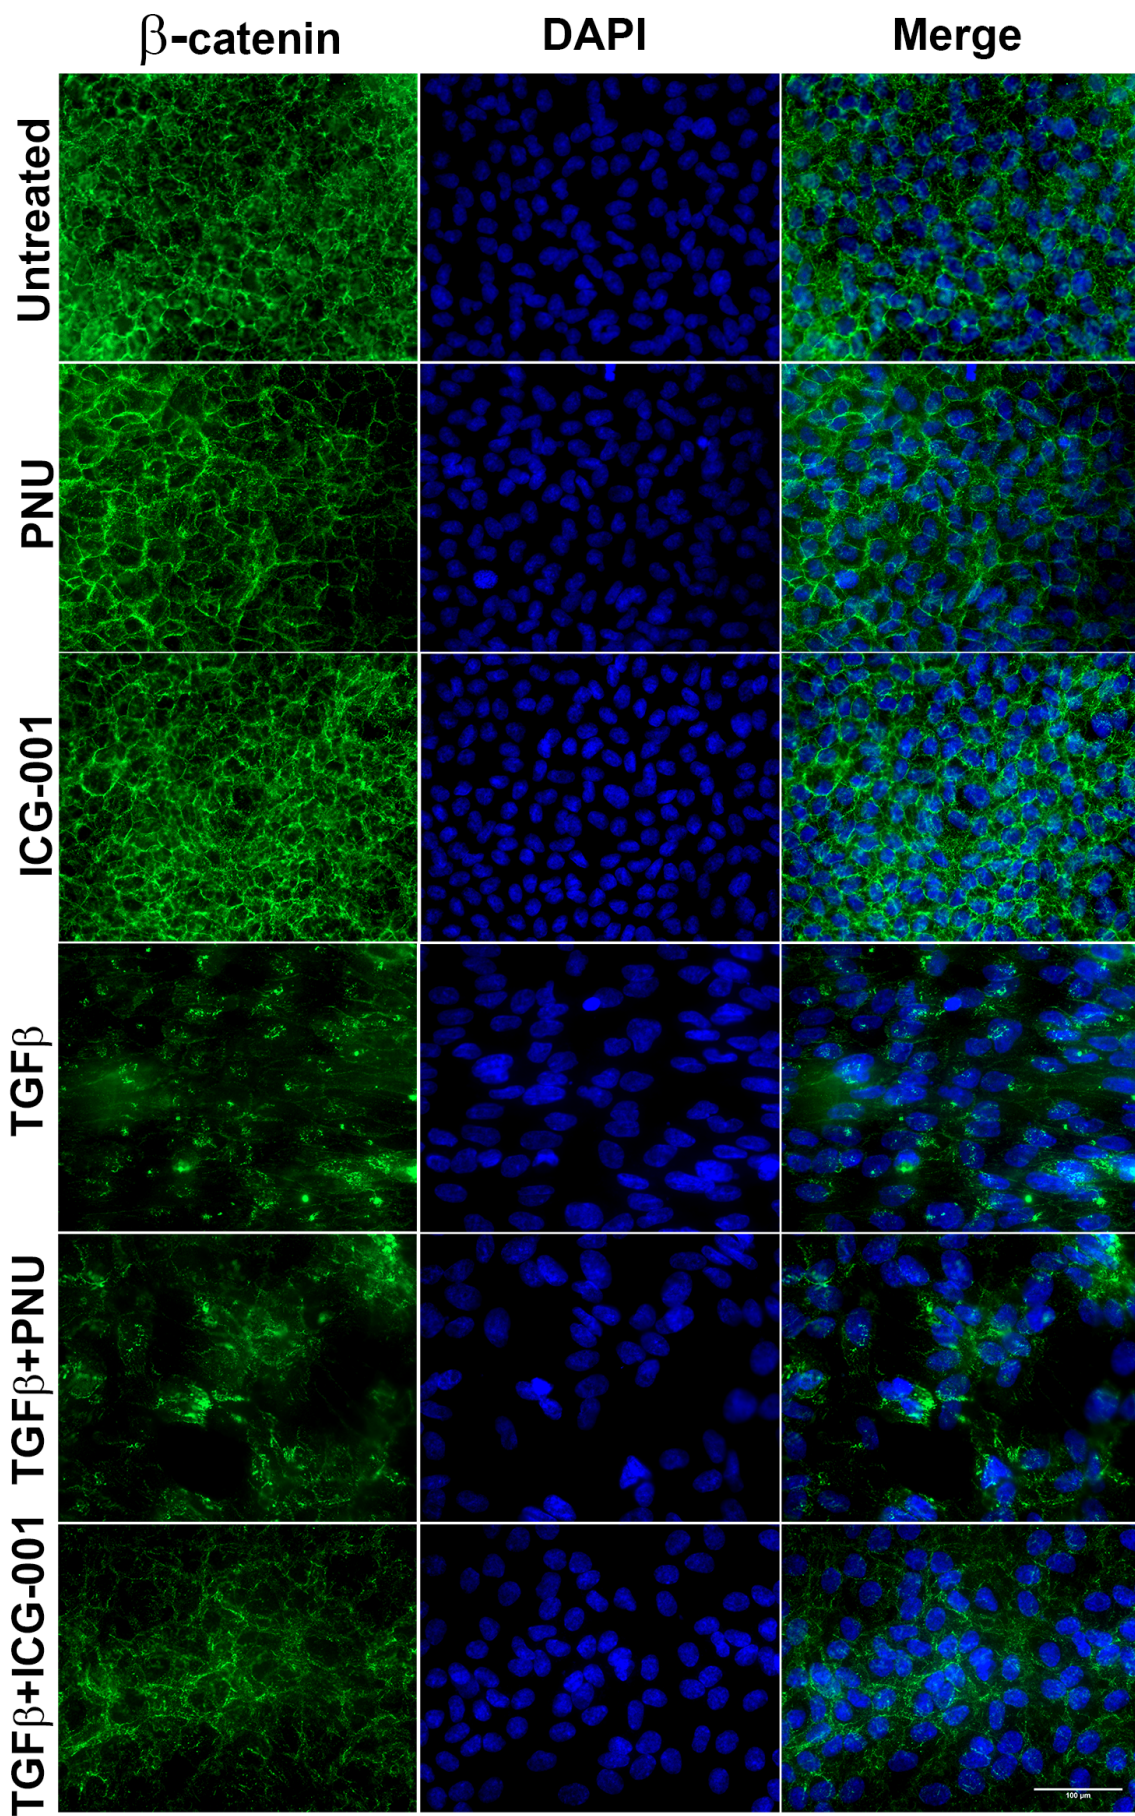

**Figure S4 – Localization of  $\beta$ -catenin in the presence of PNU and ICG-001.** Untreated, PNU-treated, ICG-001-treated, TGF- $\beta$ 2-treated, TGF- $\beta$ 2 and ICG-001 or PNU co-treated lens explants were immunostained for  $\beta$ -catenin. Slides were imaged using 63x lens of Zeiss axiovert apotome fluorescent microscope. Scale bar, 100 $\mu$ m.
